# Supplementary material for: Modification of benzoxazine with aryl-ether-ether-ketone diphenol: preparation and characterization
Source: Royal Society of Chemistry journal article supplement (doi:10.1039/c6ra27493e), 2017-01-01
Supplement: c6ra27493e1.pdf [file c6ra27493e1.pdf]

1

## Supporting Information

### 2 **Modification of Benzoxazine with Aryl-Ether-Ether-Ketone**

#### 3 **Diphenol: Preparation and Characterization**

4 Xia Yiqing, Lin Yifeng, Ran Qichao,\* Zhu Rongqi, Gu Yi\*

5 *State Key Laboratory of Polymeric Materials Engineering, College of Polymer*  
6 *Science and Engineering, Sichuan University, Chengdu, China; E-mail:*  
7 *guyi@scu.edu.cn, Fax: +86 28 85405138; Tel: +86 28 85405138.*

8

#### 9 **1. Synthesis and Characterization of Bisphenol A-aniline benzoxazine**

##### 10 **(BA-a)**

##### 11 **1.1 Synthesis of Bisphenol A-aniline benzoxazine (BA-a)**

12 To a 500 mL of flask were added sequentially toluene (100 mL), 37%  
13 formaldehyde solution (71.4 g, 0.88 mol), aniline (37.2 g, 0.4 mol) and Bisphenol-A  
14 (45.6 g, 0.2 mol). Then the mixture was slowly heated to 80 °C and hold for 5 h.  
15 When the reaction was completed, the reaction mixture was cooled and washed with 1  
16 N aqueous solution of sodium hydroxide. Then the organic layer was washed several  
17 times with deionized water and crystallized at 5°C. The precipitate product was  
18 collected by filtration and recrystallized twice from a toluene-ethanol mixed solvent.  
19 Finally, the BA-a crystal was washed with ethanol and obtained product in 78% yield.

20

##### 21 **1.2 Characterization of Bisphenol A-aniline benzoxazine (BA-a)**

22 **BA-a:** mp. 109.2°C;

23 <sup>1</sup>H NMR (400 MHz, DMSO-*d*<sub>6</sub>, δ): 7.26, 7.24, 7.22 (4H, H<sup>h</sup>, t), 7.13, 7.11 (4H, H<sup>g</sup>, d),  
24 7.00 (2H, H<sup>b</sup>, s), 6.90, 6.88, 6.86, 6.84 (4H, H<sup>f</sup>), 6.65, 6.63 (2H, H<sup>i+e</sup>), 5.41 (4H, H<sup>d</sup>, s),  
25 4.61 (4H, H<sup>c</sup>, s), 1.55 (6H, H<sup>a</sup>, s).

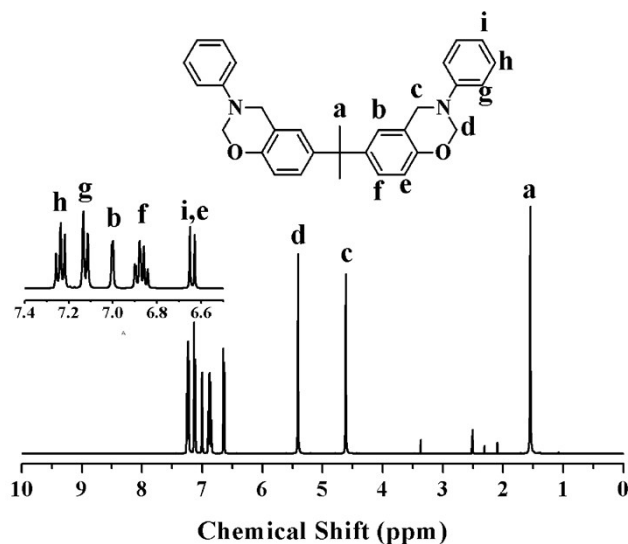

26

27

Figure S1  $^1\text{H-NMR}$  spectra of BA-a

28

29 **FT-IR** (KBr,  $\text{cm}^{-1}$ ): 2965 (stretching vibration of  $\text{CH}_3$ ); 1600  $\text{cm}^{-1}$  (framework  
30 vibration of benzene), 1496  $\text{cm}^{-1}$  (1,2,4-substitution), 1232 and 1030  $\text{cm}^{-1}$   
31 (symmetrical stretching and asymmetrical stretching of ether), 948  $\text{cm}^{-1}$  (benzoxazine  
32 ring).

33

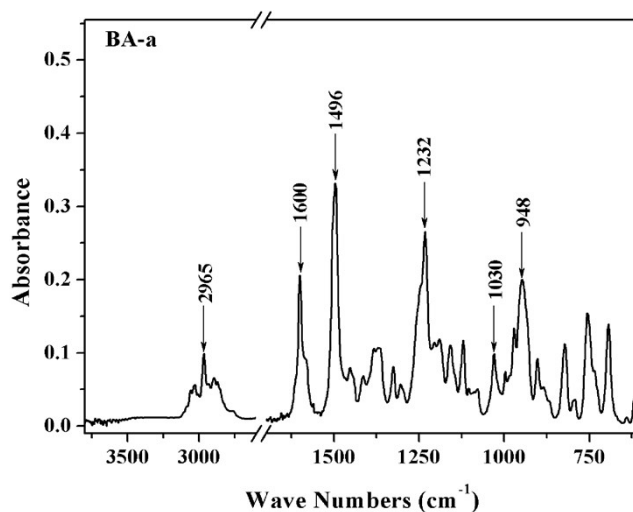

34

35

Figure SII FT-IR spectra of BA-a

36

## 37 **2. Characterization of 4,4'-bis(m-hydroxyphenoxy) benzophenone**

### 38 **(m-DHPBP)**

39  $^1\text{H NMR}$  (400 MHz,  $\text{DMSO-}d_6$ ,  $(\text{CH}_3)_4\text{Si}$ ,  $\delta_{\text{H}}$ , ppm): 9.78 (4H, Ar-OH, s), 7.79, 7.77

40 (12H, H<sup>a</sup>, d), 7.55, 7.53, 7.51 (1H, H<sup>b</sup>, t).

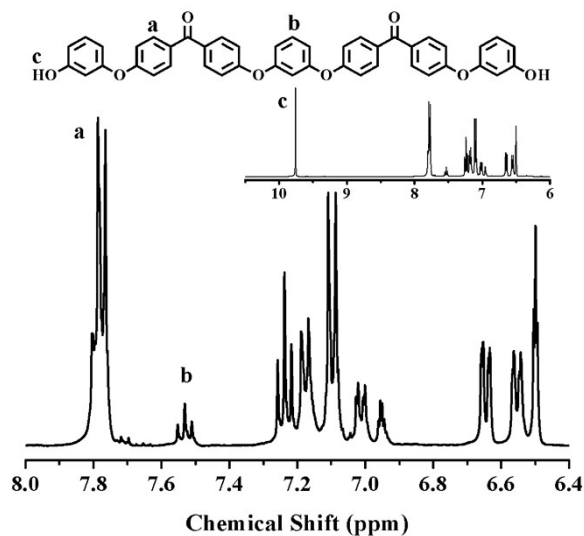

41

42 **Figure SIII** <sup>1</sup>H-NMR spectra of m-DHPBP

43

44 **FT-TR** (KBr, cm<sup>-1</sup>): 3500~3200 cm<sup>-1</sup> (Ar-OH symmetrical stretching), 1644 (C=O  
45 symmetrical stretching), 1590 cm<sup>-1</sup> (framework vibration of benzene), 1230 and 1160  
46 cm<sup>-1</sup> (symmetrical stretching and asymmetrical stretching of ether), 770 and 677 cm<sup>-1</sup>  
47 (1,3-substitution).

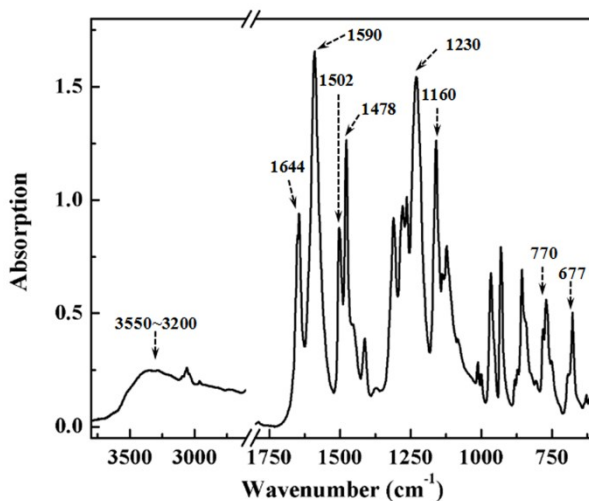

48

49 **Figure SIV** FT-IR spectra of m-DHPBP

50

51 **Gel Permeation Chromatography** (GPC): GPC experiments were performed using a  
52 Waters 2414 system, equipped with two consecutive polystyrene gel columns (Waters  
53 Styrag HR 2 DMF 7.8×300 mm and Waters Styrag HR 4 DMF 7.8×300 mm) and

54 refractive index (RI) detectors, using DMF as an eluent, at a flow rate of 1.0 mL/min,  
55 calibrated with polystyrene standards. The sample concentration in each injection  
56 solution was 0.40 wt%, and the solutions were filtered through a 0.45-um filter prior  
57 to injection. DMF at 35 °C was used as the eluent. The results obtained with the RI  
58 detector were used along with a calibration curve generated using 9 polystyrene  
59 standards to calculate the  $M_n$  values for the polymers. The peak molecular weights of  
60 the polystyrene tandards were 176000, 116000, 42400, 10700, 6520, 2650, 890, 470  
61 and 373 g·mol<sup>-1</sup>. The GPC curve showed two peaks and  $M_n$ s of peak<sup>1</sup> and peak<sup>2</sup> were  
62 3258 g/mol and 2342 g/mol, respectively.

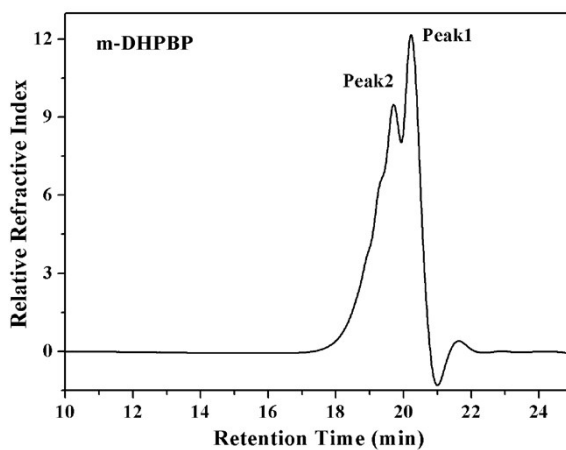

63

64

**Figure SV** GPC curve of m-DHPBP
